# Supplementary material for: Sterols from Thai Marine Sponge Petrosia (Strongylophora) sp. and Their Cytotoxicity
Source: PubMed Central journal article supplement (PMC5367011; doi:10.3390/md15030054), 2017-02-23
Supplement: marinedrugs-15-00054-s001.pdf [file marinedrugs-15-00054-s001.pdf]

# Supplementary Materials: Sterols from Thai Marine Sponge *Petrosia (Strongylophora)* sp. and Their Cytotoxicity

Phanruethai Pailee, Chulabhorn Mahidol, Somsak Ruchirawat and Vilailak Prachyawarakorn

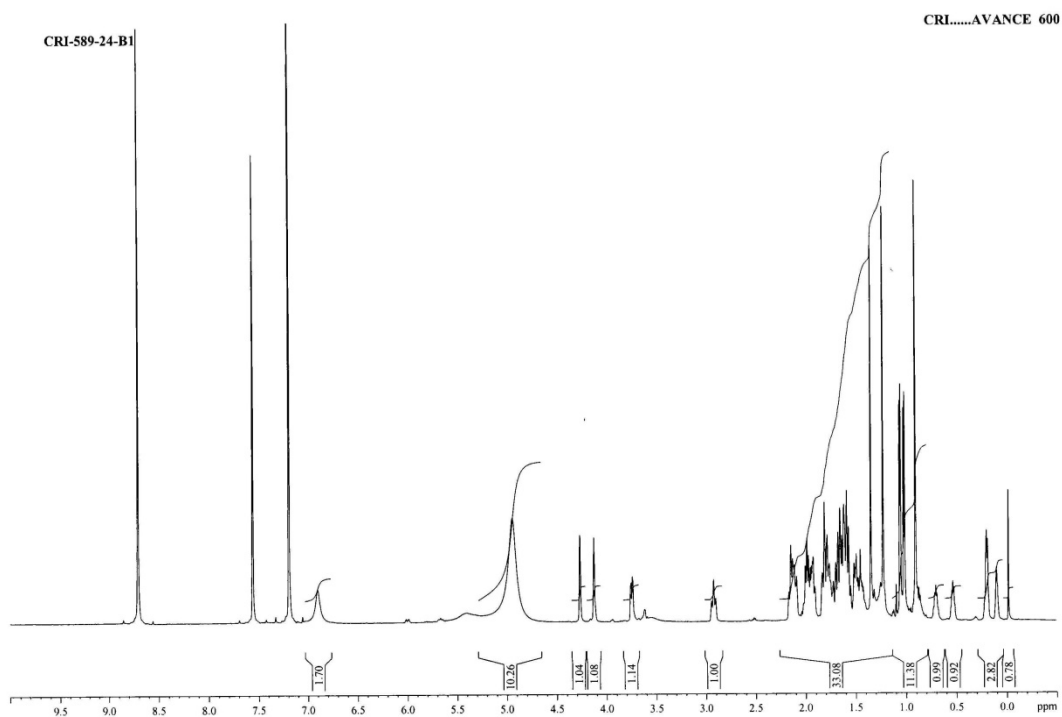

Figure S1.  $^1\text{H}$  NMR spectrum of **1** in pyridine- $d_5$

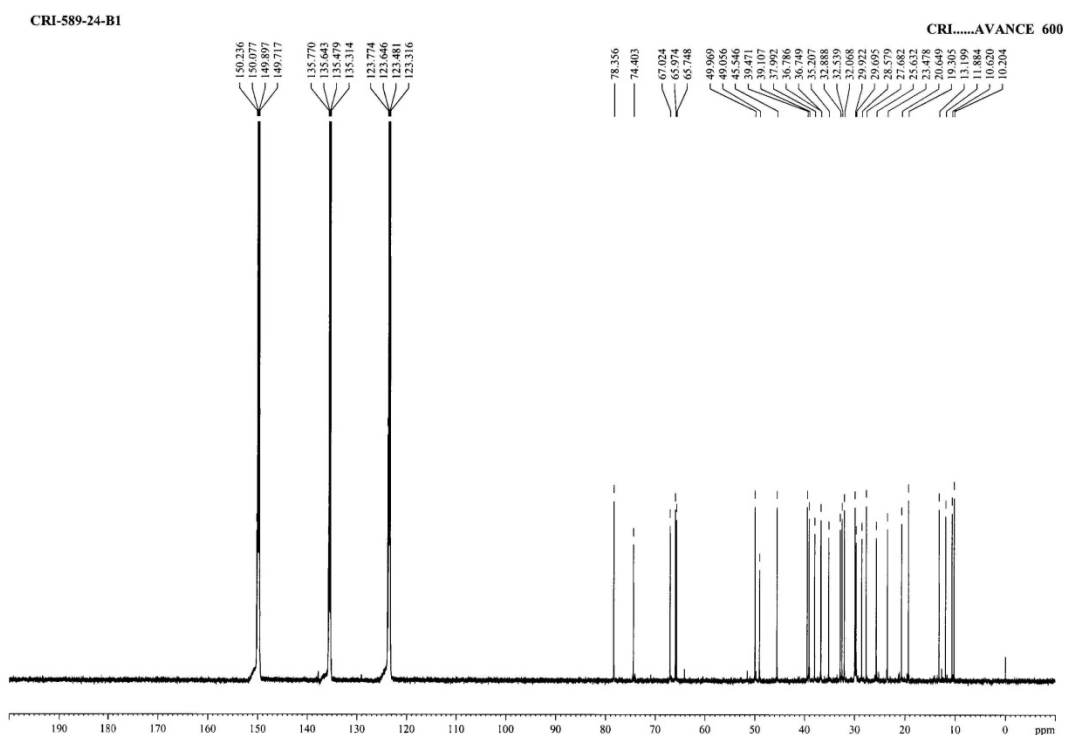

Figure S2.  $^{13}\text{C}$  NMR spectrum of **1** in pyridine-*d*<sub>5</sub>

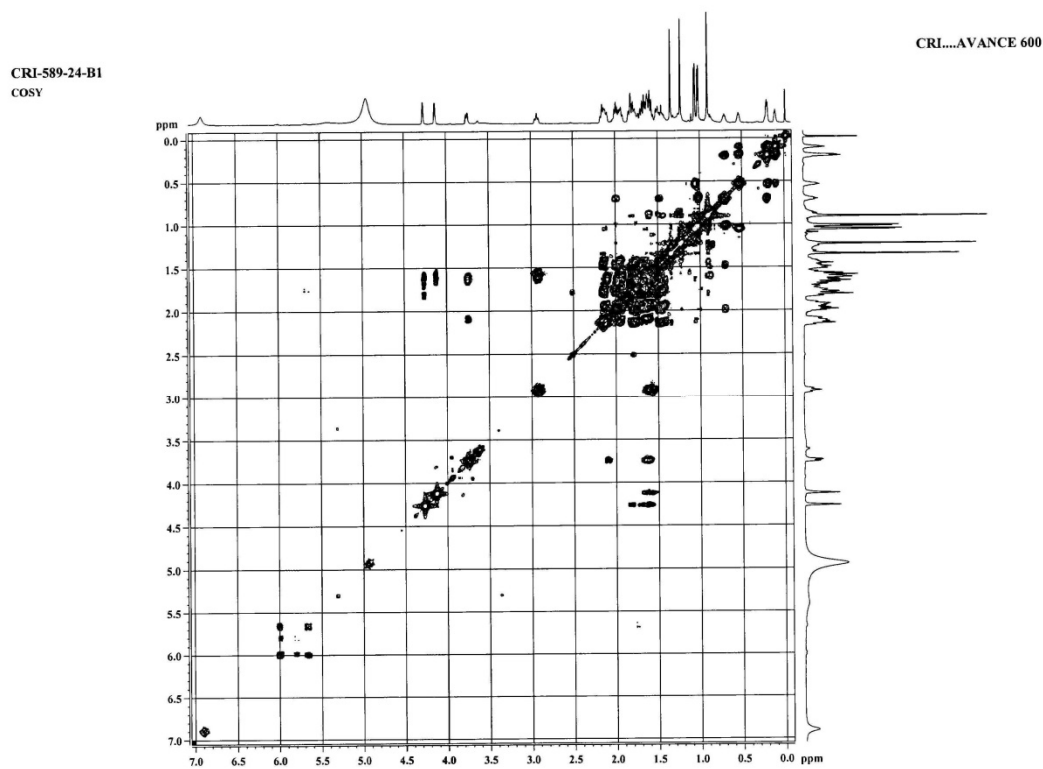

Figure S3.  $^1\text{H}$ - $^1\text{H}$  COSY spectrum of **1** in pyridine-*d*<sub>5</sub>

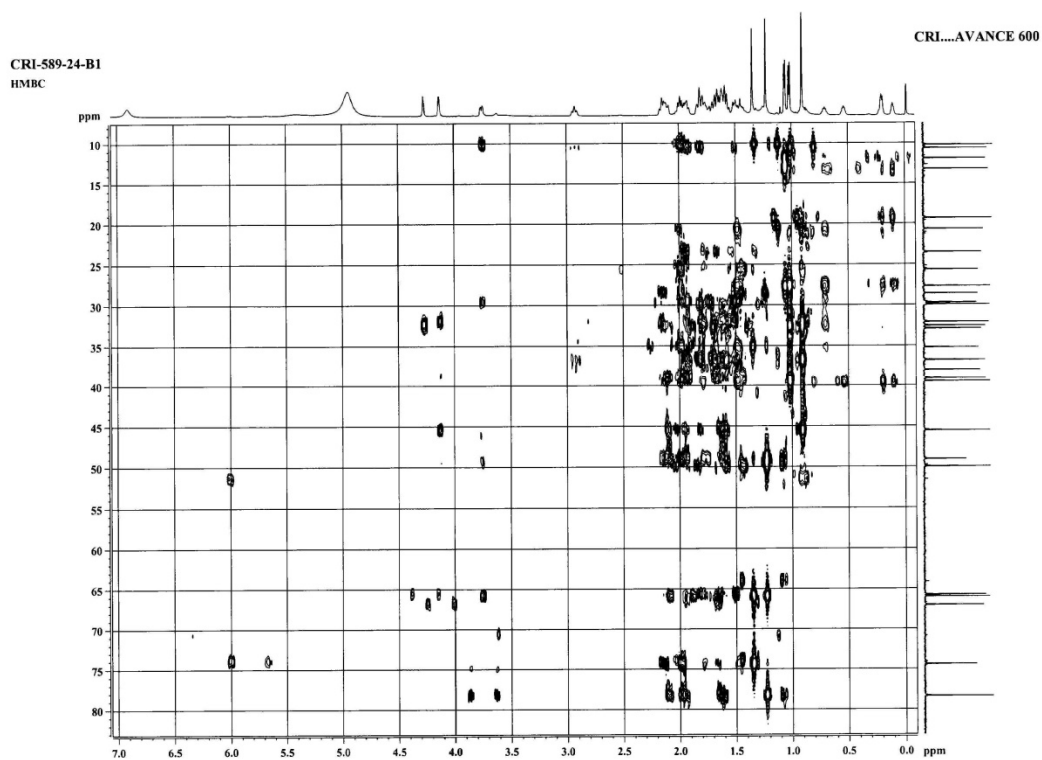

Figure S4. HMBC spectrum of **1** in pyridine-*d*<sub>5</sub>

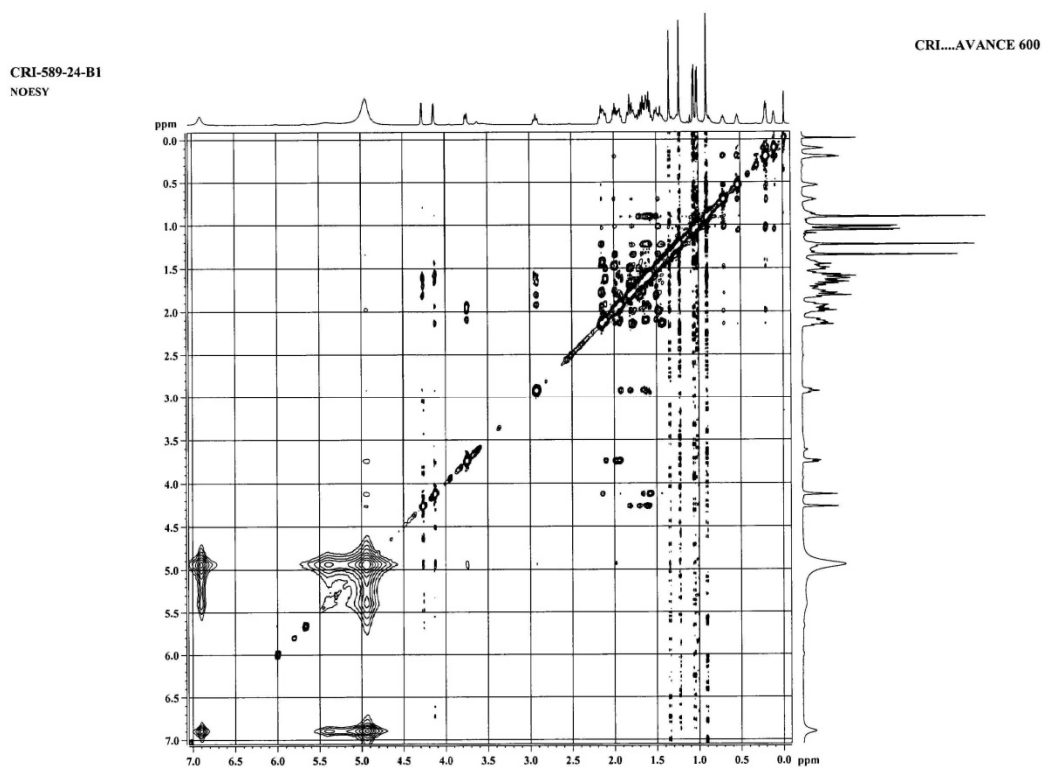

Figure S5. NOESY spectrum of **1** in pyridine-*d*<sub>5</sub>

# Mass Spectrum List Report

**Analysis Info**

Analysis Name TOFCRI013162 Vilailuk CRI-589-24-B1 A--d Acquisition Date 6/5/2012 11:36:06 AM  
 Method apci\_neg\_low-nitirat1.m Operator Administrator  
 Sample Name APCIneg Operator:Nitirat Instrument micrOTOF 74

**Acquisition Parameter**

|             |          |               |          |                    |        |
|-------------|----------|---------------|----------|--------------------|--------|
| Source Type | APCI     | Ion Polarity  | Negative | Set Corrector Fill | 56 V   |
| Scan Range  | n/a      | Capillary Ext | -90.0 V  | Set Pulsar Pull    | 409 V  |
| Scan Begin  | 120 m/z  | Hexapole RF   | 120.0 V  | Set Pulsar Push    | 409 V  |
| Scan End    | 1000 m/z | Skimmer 1     | -30.0 V  | Set Reflector      | 1300 V |
|             |          | Hexapole 1    | -24.0 V  | Set Flight Tube    | 9000 V |
|             |          |               |          | Set Detector TOF   | 2250 V |

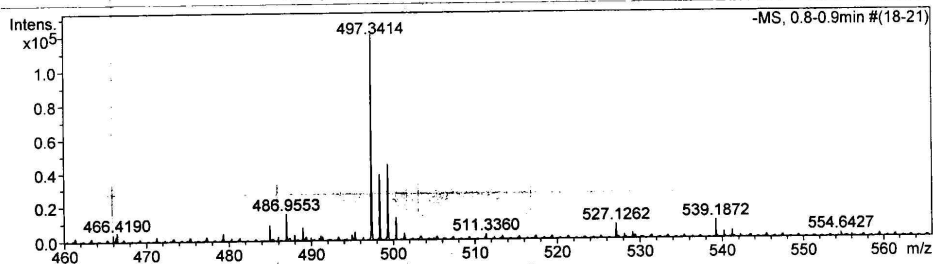

| #  | m/z       | Res.  | S/N    | I      | FWHM   |
|----|-----------|-------|--------|--------|--------|
| 1  | 145.3359  | 2363  | 742.2  | 51189  | 0.0615 |
| 2  | 145.5963  | 2178  | 297.0  | 20500  | 0.0669 |
| 3  | 145.8546  | 2139  | 286.4  | 19767  | 0.0682 |
| 4  | 146.1159  | 2447  | 115.2  | 7963   | 0.0597 |
| 5  | 197.0226  | 6642  | 108.3  | 13060  | 0.0297 |
| 6  | 213.0172  | 6834  | 141.4  | 19642  | 0.0312 |
| 7  | 215.0323  | 6999  | 1175.8 | 164071 | 0.0307 |
| 8  | 216.0359  | 6863  | 84.4   | 11748  | 0.0315 |
| 9  | 217.0303  | 7154  | 393.3  | 54172  | 0.0303 |
| 10 | 229.0484  | 7002  | 1606.8 | 202711 | 0.0327 |
| 11 | 230.0520  | 7226  | 135.5  | 17014  | 0.0318 |
| 12 | 231.0462  | 7235  | 545.5  | 67812  | 0.0319 |
| 13 | 441.0079  | 9134  | 493.3  | 75196  | 0.0483 |
| 14 | 442.0107  | 8973  | 102.3  | 15871  | 0.0493 |
| 15 | 443.0050  | 8899  | 452.4  | 70480  | 0.0498 |
| 16 | 444.0082  | 9113  | 97.3   | 15434  | 0.0487 |
| 17 | 445.0026  | 9062  | 155.1  | 24775  | 0.0491 |
| 18 | 484.9590  | 8722  | 49.4   | 8960   | 0.0556 |
| 19 | 486.9553  | 9333  | 86.2   | 15433  | 0.0522 |
| 20 | 497.3414  | 9155  | 696.9  | 120589 | 0.0543 |
| 21 | 498.3441  | 9436  | 224.7  | 38896  | 0.0528 |
| 22 | 499.3398  | 9194  | 258.9  | 44686  | 0.0543 |
| 23 | 500.3438  | 8871  | 73.9   | 12845  | 0.0564 |
| 24 | 527.1262  | 9300  | 51.8   | 8341   | 0.0567 |
| 25 | 539.1872  | 9120  | 70.9   | 10365  | 0.0591 |
| 26 | 655.9903  | 9563  | 102.9  | 8907   | 0.0686 |
| 27 | 718.8331  | 42208 | 111.9  | 8778   | 0.0170 |
| 28 | 955.9719  | 10931 | 713.8  | 37827  | 0.0875 |
| 29 | 957.9704  | 10694 | 236.2  | 12604  | 0.0896 |
| 30 | 1025.6957 | 50067 | 223.3  | 9170   | 0.0205 |

Figure S6. HRMS spectrum of 1

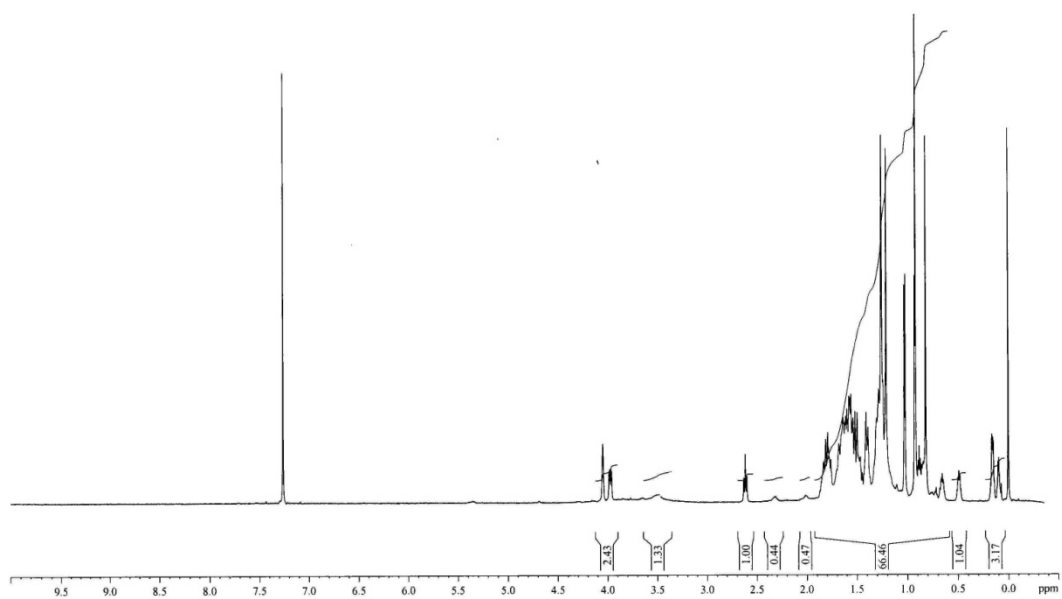Figure S7.  $^1\text{H}$  NMR spectrum of **2** in  $\text{CDCl}_3$ 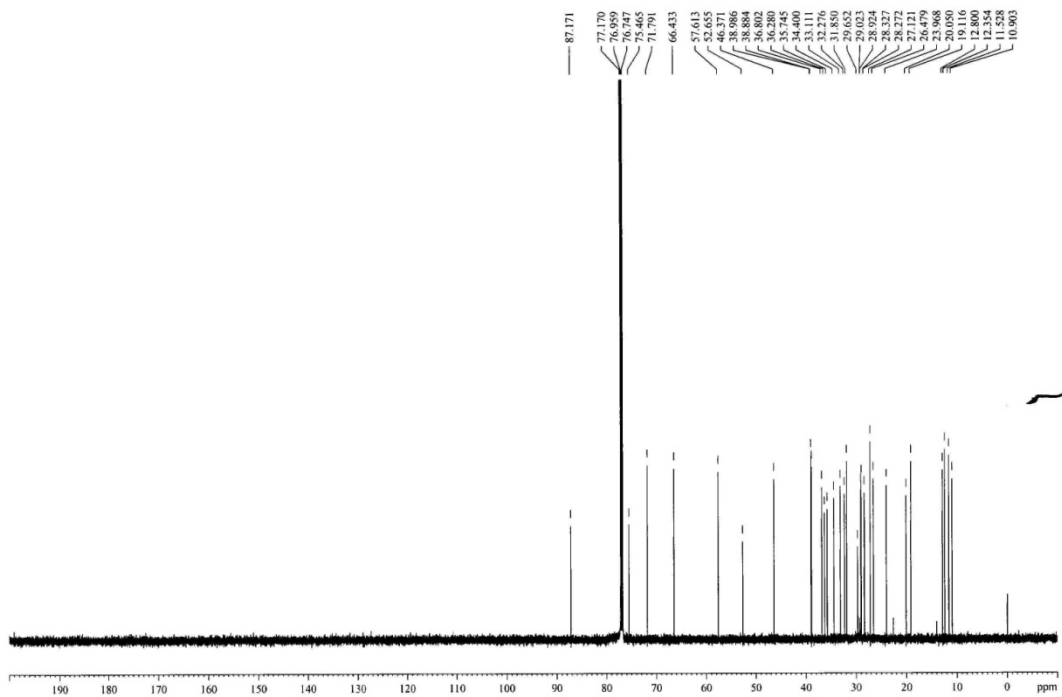Figure S8.  $^{13}\text{C}$  NMR spectrum of **2** in  $\text{CDCl}_3$

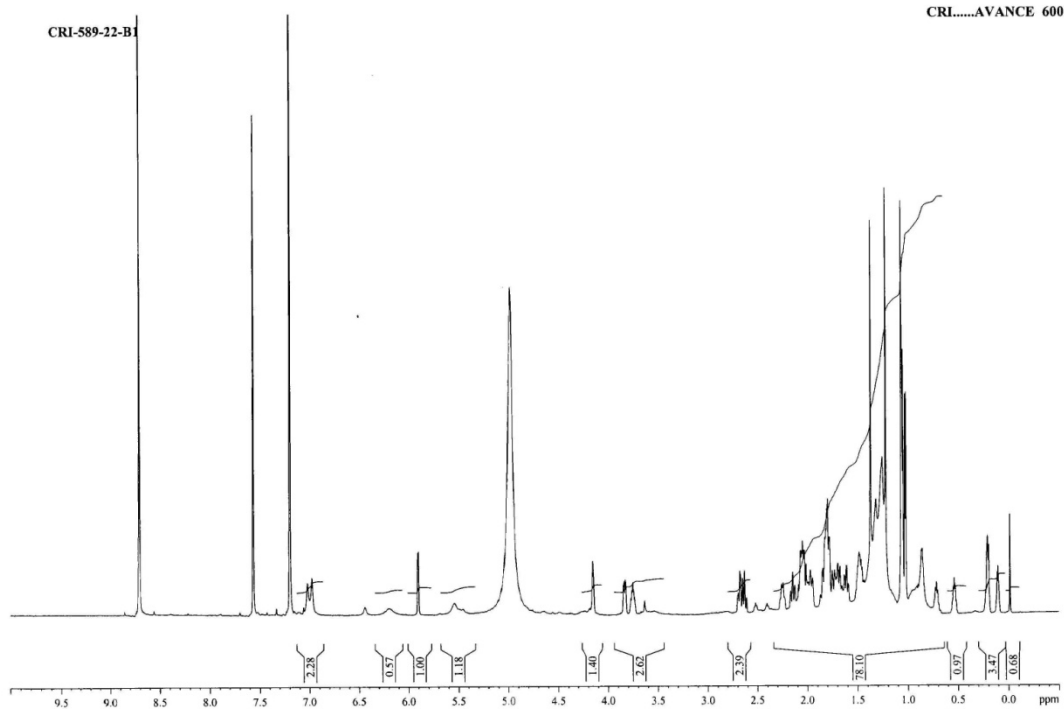

Figure S9.  $^1\text{H}$  NMR spectrum of **3** in pyridine- $d_5$

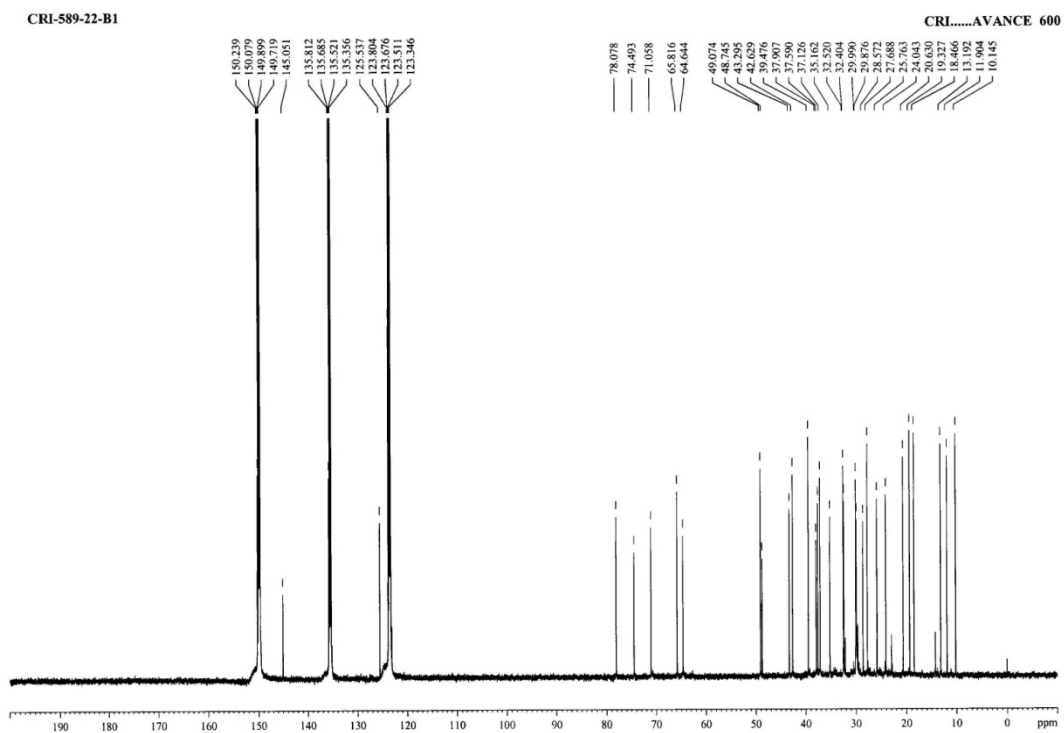

Figure S10.  $^{13}\text{C}$  NMR spectrum of **3** in pyridine- $d_5$

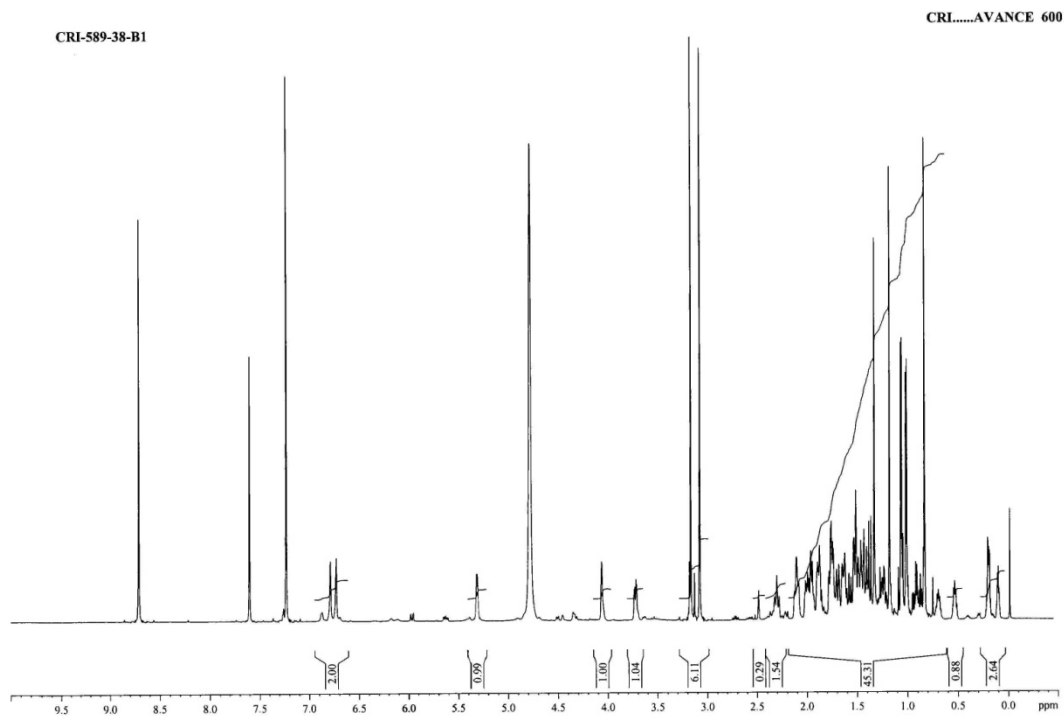

Figure S11.  $^1\text{H}$  NMR spectrum of **4** in  $\text{CDCl}_3$

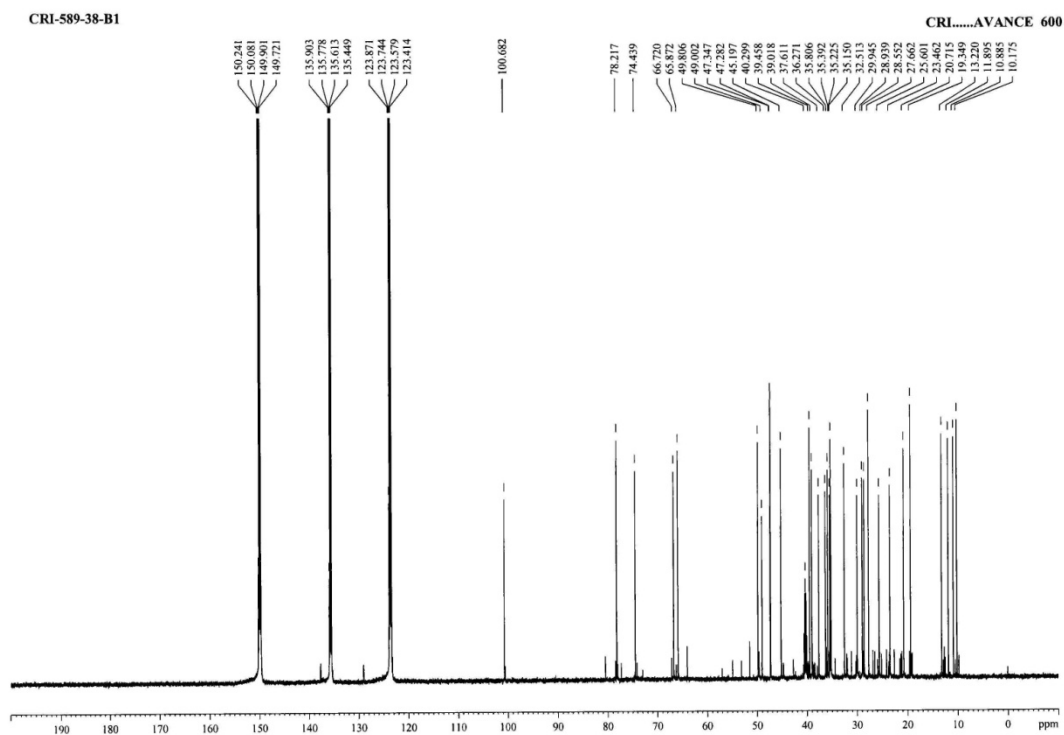

Figure S12.  $^{13}\text{C}$  NMR spectrum of **4** in  $\text{CDCl}_3$

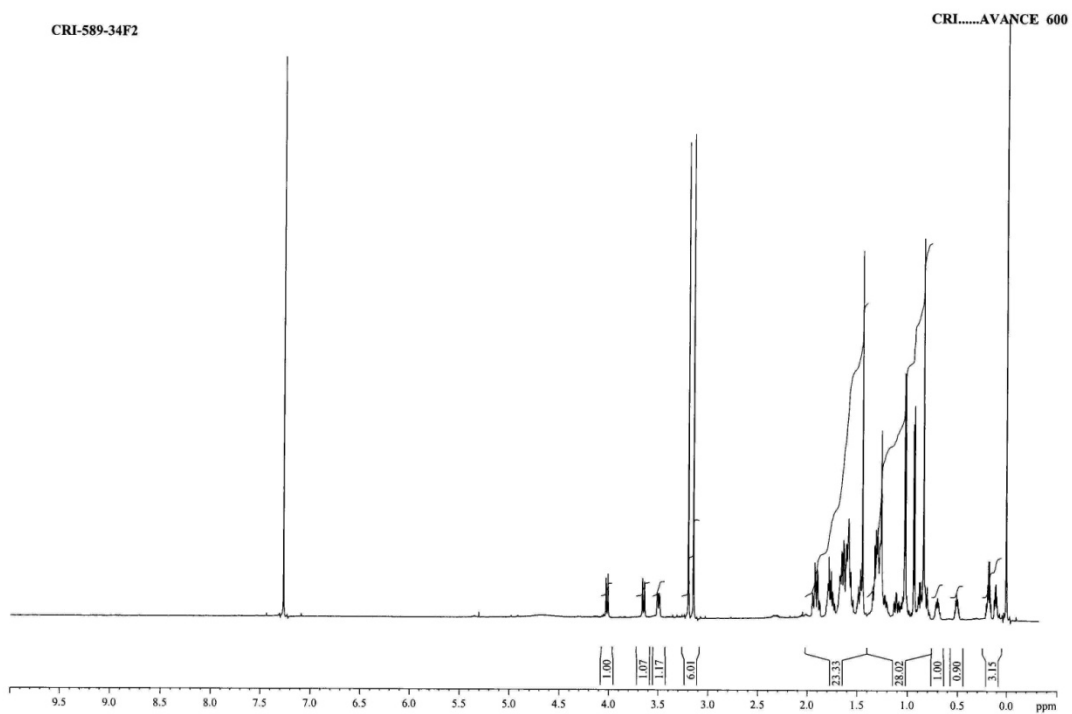

Figure S13.  $^1\text{H}$  NMR spectrum of **5** in pyridine- $d_5$

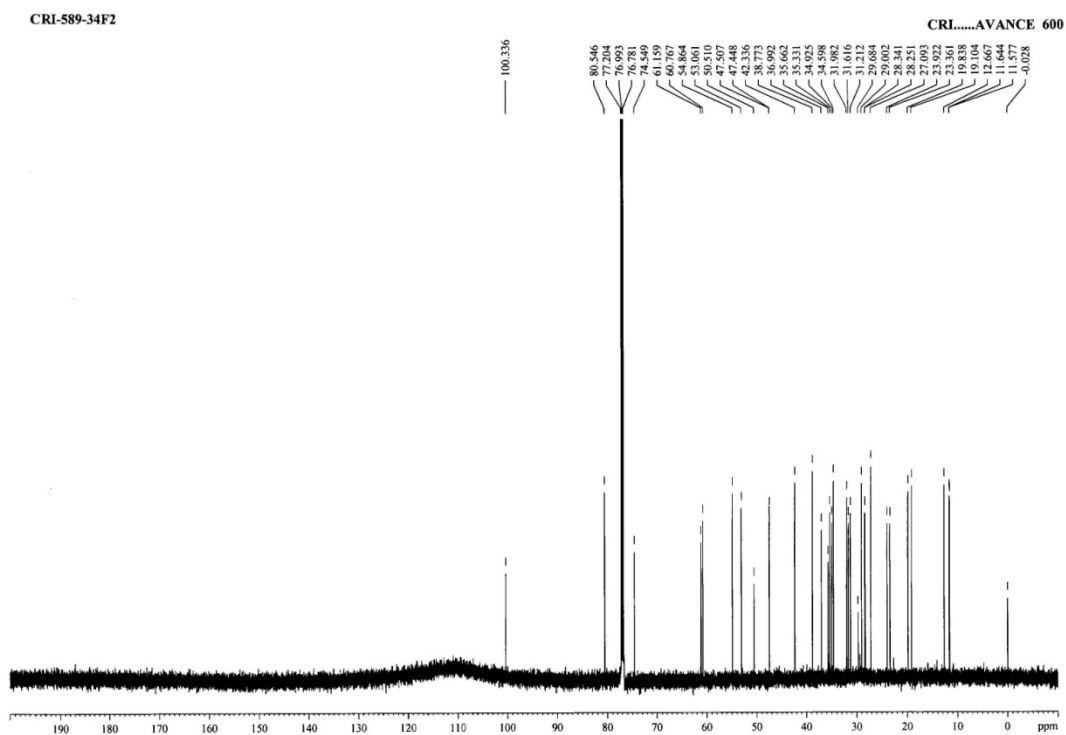

Figure S14.  $^{13}\text{C}$  NMR spectrum of **5** in pyridine- $d_5$



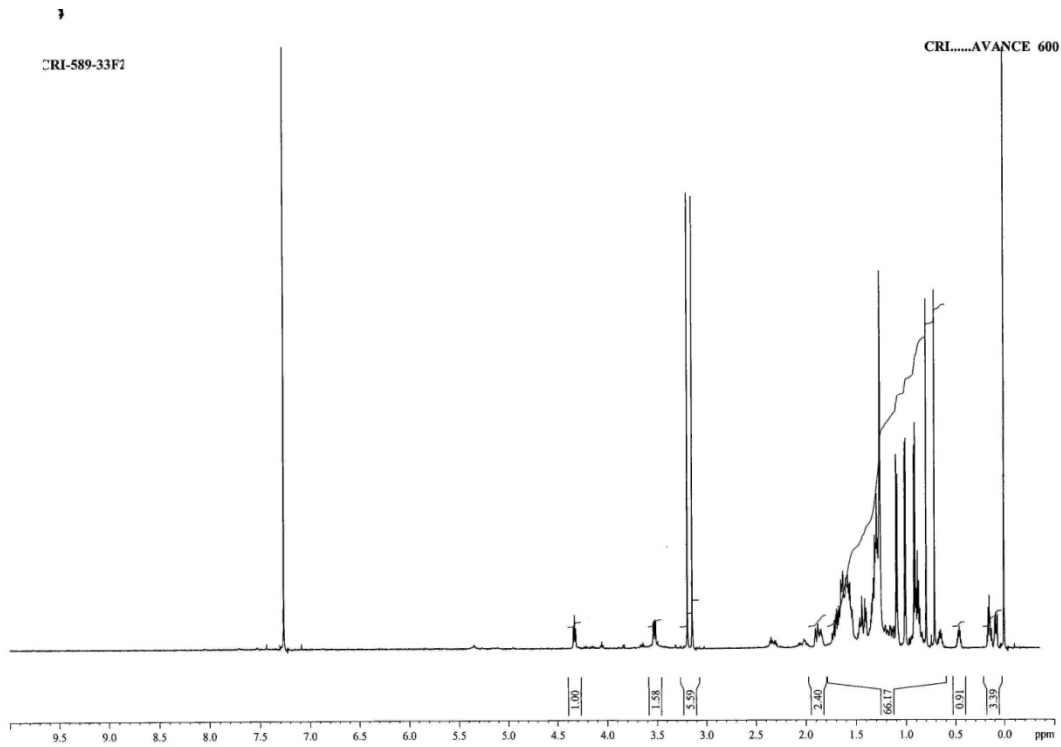

Figure S15.  $^1\text{H}$  NMR spectrum of **11** in  $\text{CDCl}_3$

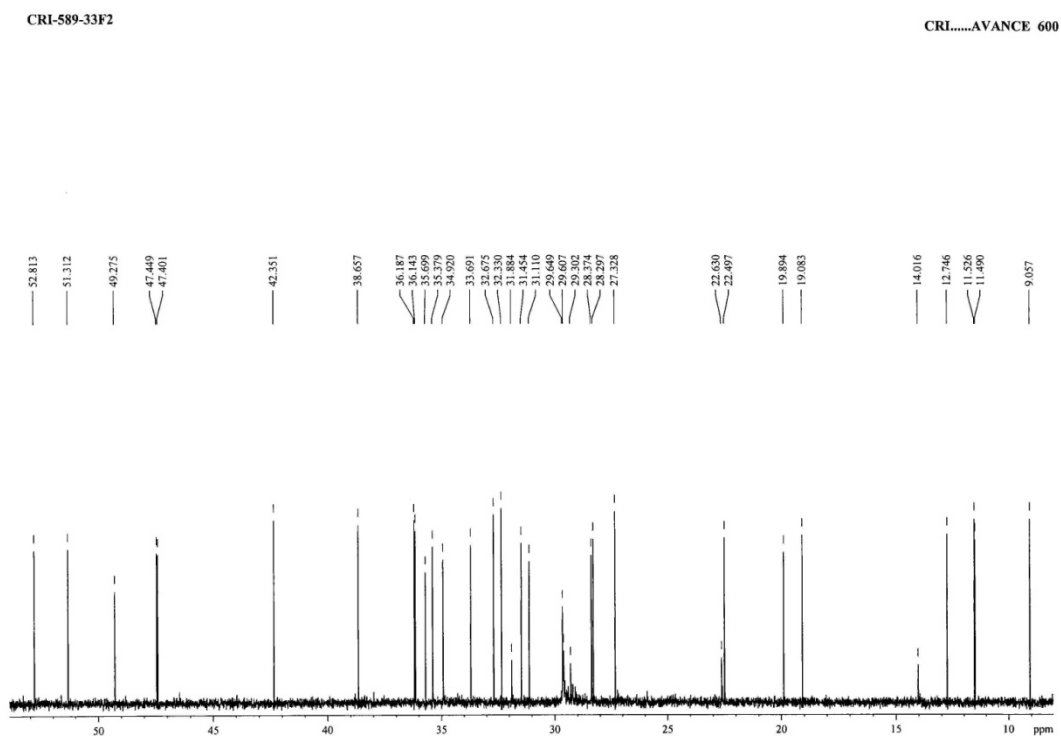

Figure S16.  $^{13}\text{C}$  NMR spectrum of **11** in  $\text{CDCl}_3$

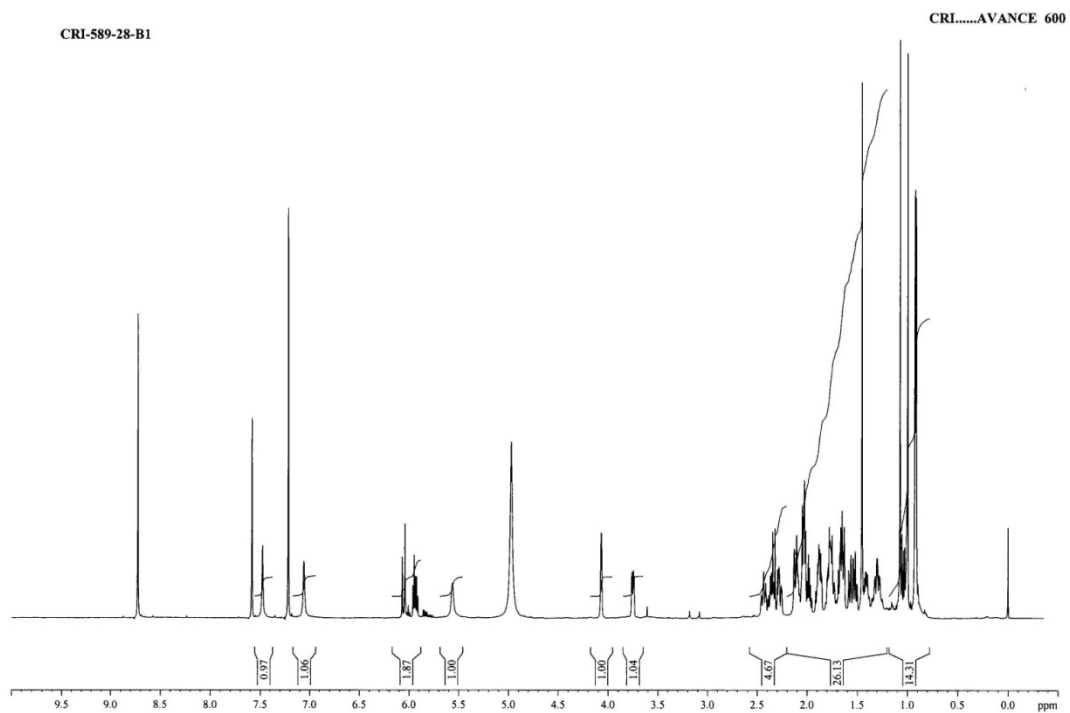

Figure S17.  $^1\text{H}$  NMR spectrum of **12** in pyridine- $d_5$

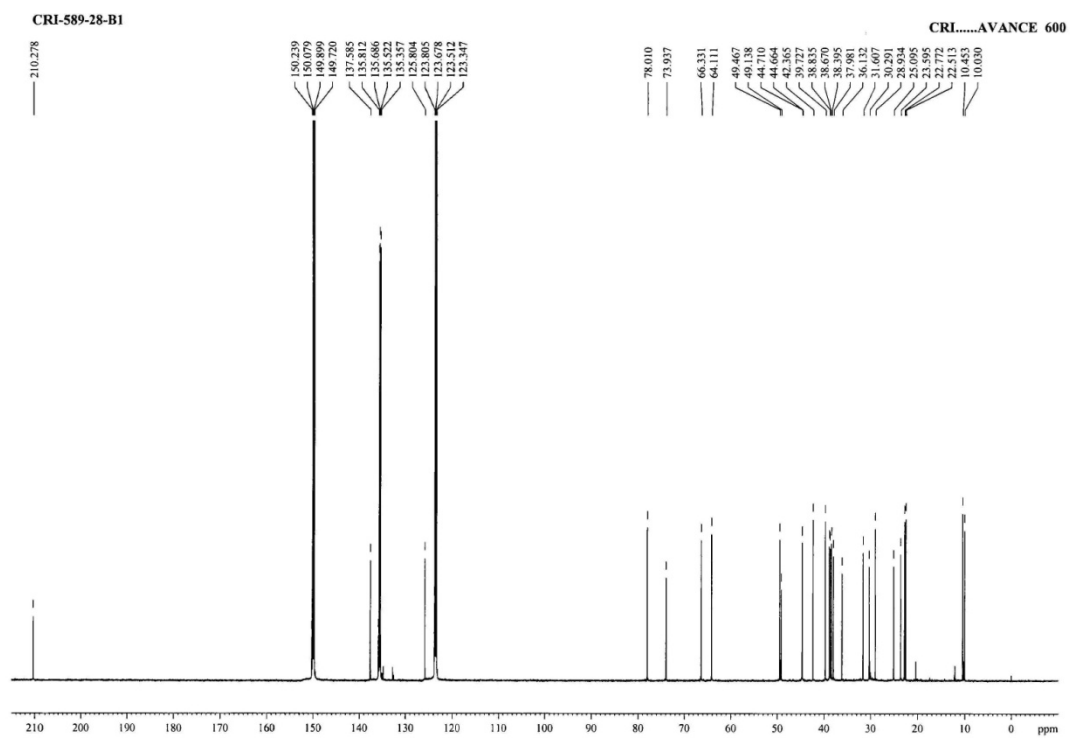

Figure S18.  $^{13}\text{C}$  NMR spectrum of **12** in pyridine- $d_5$

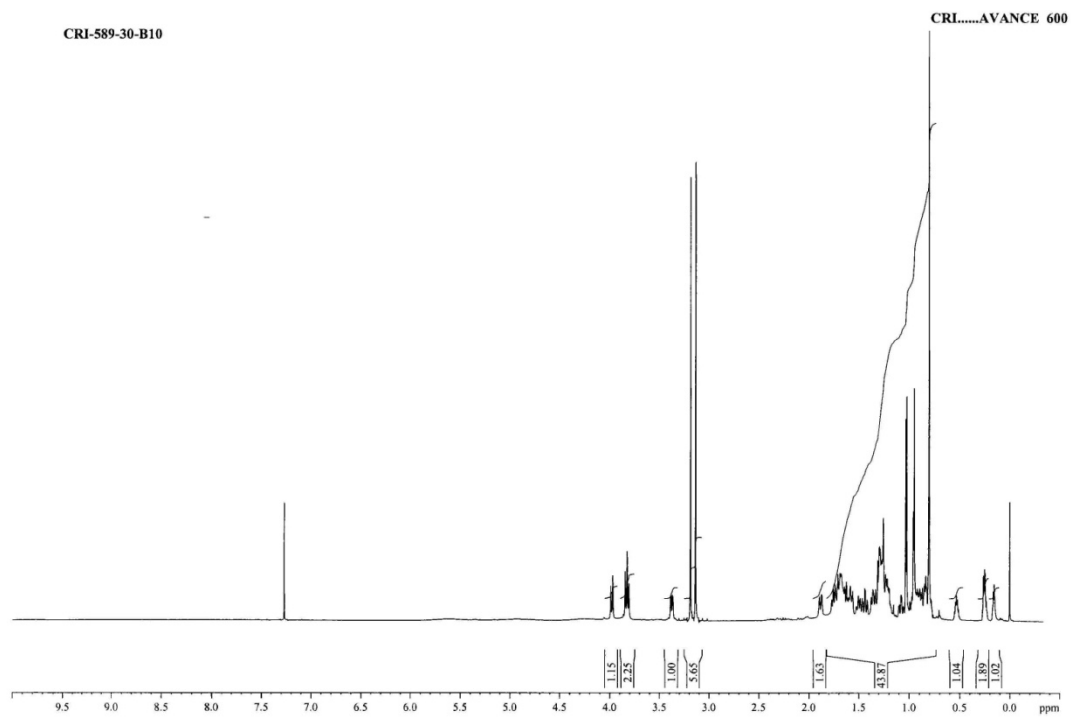

Figure S19.  $^1\text{H}$  NMR spectrum of **13** in  $\text{CDCl}_3$

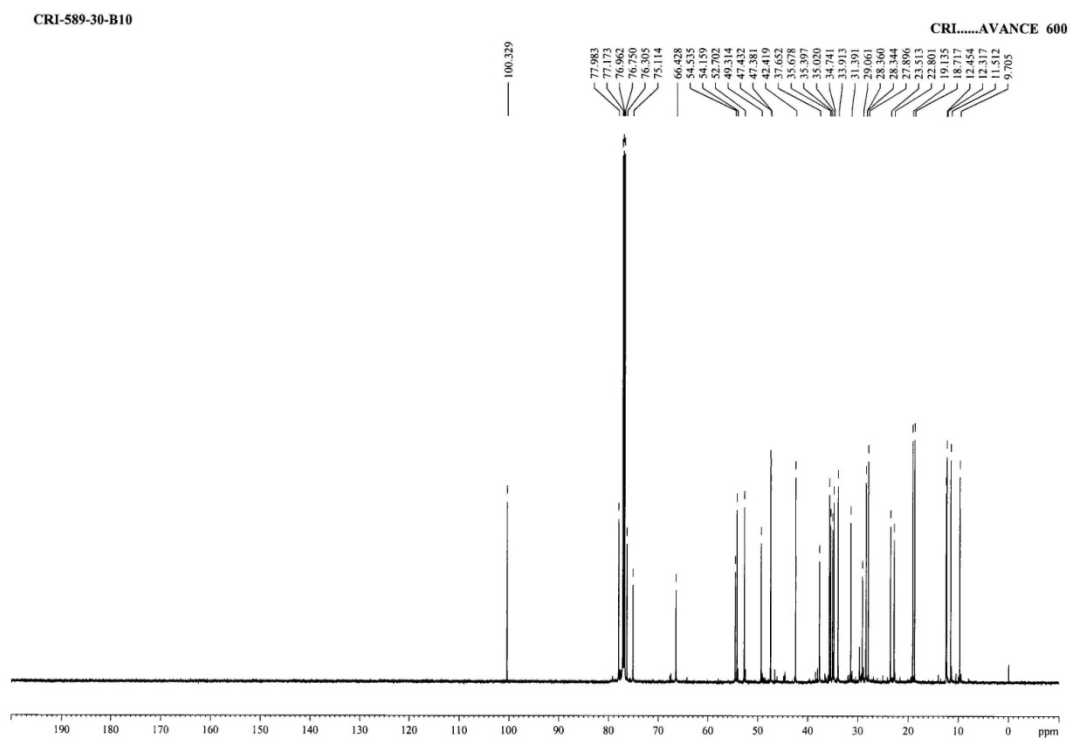

Figure S20.  $^{13}\text{C}$  NMR spectrum of **13** in  $\text{CDCl}_3$
